# Supplementary material for: Aedes aegypti Piwi4 Structural Features Are Necessary for RNA Binding and Nuclear Localization
Source: MDPI journal article supplement (doi:10.3390/ijms222312733), 2021-11-25
Supplement: s1 [file s1]

## Supplemental Tables

| Parameter                                        | Value  |
|--------------------------------------------------|--------|
| Molecular weight (g/mol)                         | 12,945 |
| Net charge at neutral pH 7                       | 5.08   |
| pI                                               | 9.17   |
| Average hydropathy (GRAVY)                       | -0.66  |
| Aliphatic index                                  | 69     |
| Abs280                                           | 0.82   |
| Molar Extinction Coefficient ( $M^{-1}cm^{-1}$ ) | 10,430 |

### Supplemental Table S1. Biophysical properties of predicted AePiwi4 PAZ.

Biophysical parameters and associated values for AePiwi4 PAZ. pI = isoelectric point. Average hydropathy = the Kyte-Doolittle hydropathy value. Abs280 = the absorbance at 280 nm in an oxidized environment. Molar Extinction Coefficient = the amount of light the protein absorbs, used to calculate protein concentration.

| Organism          | Piwi PAZ binding partner | Ligand $K_D$ binding affinity ( $\mu M$ ) |            | Reference              |
|-------------------|--------------------------|-------------------------------------------|------------|------------------------|
|                   |                          | 3' 2' O-met                               | 3' 2' OH   |                        |
| <i>Drosophila</i> | Piwi                     | 4                                         | unreported | Yamaguchi et al., 2020 |
| Human             | Hiwi1                    | 6.5                                       | 16         | Tian et al., 2011      |
| Human             | Hiwi2                    | 2                                         | 12         | Tian et al., 2011      |
| Human             | Hili                     | 10                                        | 34         | Tian et al., 2011      |

### Supplemental Table S2. Summary of known Piwi PAZ binding affinities for 3' 2' O-methylated (3' 2' O-met) or non-methylated (3' 2' OH) piRNAs.

| primer name | sequence                    | purpose                                           |
|-------------|-----------------------------|---------------------------------------------------|
| piwi4Nde_F  | CATATGTCTGACCGTTACTCTCAAGGG | Piwi4 restriction enzyme-mediated cloning pET-17b |
| piwi4Xho_R  | CTCGAGTCAGTGGTGGTGGT        | Piwi4 restriction enzyme-mediated cloning pET-17b |
| piwi4_int_R | TGGTAGACATCTCCAGTACGTTTCG   | Piwi4 sequencing primer                           |

|                       |                                                  |                                                                    |
|-----------------------|--------------------------------------------------|--------------------------------------------------------------------|
| piwi4pazND<br>E_F     | CATATGCAGACATGCTACGACATCTTG                      | Piwi4 PAZ<br>restriction<br>enzyme-<br>mediated<br>cloning pET-17b |
| piwi4pazxho<br>his_R  | CTCGAGTCAATGGTGATGGTGATGATGCGTCA<br>TCTG         | Piwi4 PAZ<br>restriction<br>enzyme-<br>mediated<br>cloning pET-17b |
| QC-PAZ17-<br>T41A-F   | CAACAATAAAACCTATGCCATTACGACGTCAC                 | Piwi4 PAZ T41A<br>mutation                                         |
| QC-PAZ17-<br>T41A-R   | GTGACGTCGTGAATGGCATAGGTTTTATTGTTG                | Piwi4 PAZ T41A<br>mutation                                         |
| QC-PAZ17-<br>T41R-F   | GTTACAACAATAAAACCTATCGCATTACGACG<br>TCACGTTTG    | Piwi4 PAZ T41R<br>mutation                                         |
| QC-PAZ17-<br>T41R-R   | CAAACGTGACGTCGTGAATGCGATAGGTTTTAT<br>TGTTGTAAC   | Piwi4 PAZ T41R<br>mutation                                         |
| QC-PAZ17-<br>Y40A-F   | GTTACAACAATAAAACCGCTACCATTACGACG<br>TCAC         | Piwi4 PAZ Y40A<br>mutation                                         |
| QC-PAZ17-<br>Y40A-R   | GTGACGTCGTGAATGGTAGCGGTTTTATTGTTG<br>TAAC        | Piwi4 PAZ Y40A<br>mutation                                         |
| QC-PAZ17-<br>T39A-F   | CGGTTACAACAATAAAGCCTATAACCATTACGA<br>C           | Piwi4 PAZ T39A<br>mutation                                         |
| QC-PAZ17-<br>T39A-R   | GTCGTGAATGGTATAGGCTTTATTGTTGTAACC<br>G           | Piwi4 PAZ T39A<br>mutation                                         |
| QC-PAZ17-<br>F55A-F   | GAAACCACTCCGGAGAGTACGGCCGATACCAA<br>GGCCGGTAAAAC | Piwi4 PAZ F55A<br>mutation                                         |
| QC-PAZ17-<br>F55A-R   | GTTTTACCGGCCTTGGTATCGGCCGTACTCTC<br>CGGAGTGGTTTC | Piwi4 PAZ F55A<br>mutation                                         |
| Inf-NLS-<br>NcoI-F    | GGCTGCCGCCACCATGGGATCGAGGGAACCG<br>AGAGAACAC     | Piwi4 NLS<br>infusion-<br>mediated<br>cloning                      |
| Inf-NLS-<br>NcoI-R    | CCCTTGCTCACCATGGCTCCAACGCCACGGCG<br>ACTGCG       | Piwi4 NLS/N<br>terminal<br>infusion-<br>mediated<br>cloning        |
| InfNLSlong-<br>NcoI-F | GGCTGCCGCCACCATGGGATCTGACCGTTACT<br>CTCAAGGG     | Piwi4 N terminal<br>infusion-<br>mediated<br>cloning               |

**Supplemental Table S3. Primers used in this study.** Primer names (left), sequences (middle) and reason for use (right).

| RNA             | sequence                                                            |
|-----------------|---------------------------------------------------------------------|
| pclvpirnabio    | [BioON]CGA[U]AAG[U]GA[U]C[U][U][U]CAGCAC[U]GCAGAA                   |
| pclvpirnametbio | [BioON]CGA[U]AAG[U]GA[U]C[U][U][U]CAGCAC[U]GCAGA[2OMe A]            |
| scrampirnabio   | [BioON] A [U] GAG GAC A [U] AAG CC [U] ACG [U] AG [U] A [U] [ U] CC |

**Supplemental Table S4. RNA used in this study.** RNA sequences used for SPR experiments. BioON = biotinylated. 2OMe = 3' 2' O-methylated.

## Supplemental Figures

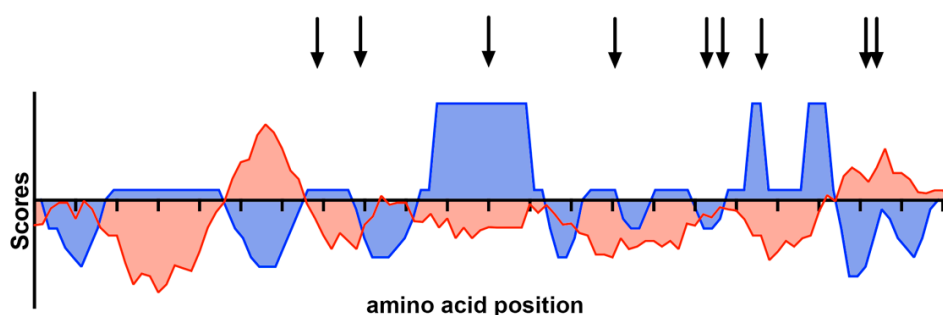

**Supplemental Figure S1. Predicted AePiwi4 PAZ flexibility, hydrophobicity, and RNA binding pockets.** Flexibility scores (Karplus-Schulz prediction) in blue and hydrophobicity scores (Hopp-Woods prediction) in red. Arrows indicate predicted RNA binding sites based on other crystalized Piwi structures. Graphs superimposed to each other in relation to their threshold scores.

### S2A.

#### >AePiwi4\_PAZ\_DNA

```
catatgCAGACATGCTACGACATCTTGCGCGATTGTCAGAAGCACGATCGTAACTACA
AGGATTCGTTCAAACGTGCCGTACTTGGTGTCTGTTGTACTGACCGGTTACAACAAT
AAAACCTATAACCATTCACGACGTCACGTTTGAAACCACTCCGGAGAGTACGTTCTGA
TACCAAGGCCGGTAAAACGTCCTTCATTGAGTATTACAAACAGAAGTACAACATTC
GCATTCGTGATCCACATCAGCCTATGTTGCTGTCTGCGAGCCAAGAAACGCGATCT
GCGCGCTGGAGGCAGCGAACTCATGGCCCTTGTTCCAGAACTGTGCCAGATGAC
GCATCATCACCATCACCATTGActcgag
```

### S2B.

#### >AePiwi4\_PAZ\_protein

```
MQTCYDILRDCQKHDRNYKDSFKRAVLGVVLTGYNNKTYTIHDTVTFETTPESTFDTK
AGKTSFIEYYKQKYNIRIRDPHQPMLLSRAKKRDLRAGGSELMALVPELCQMTHHHHH
H
```

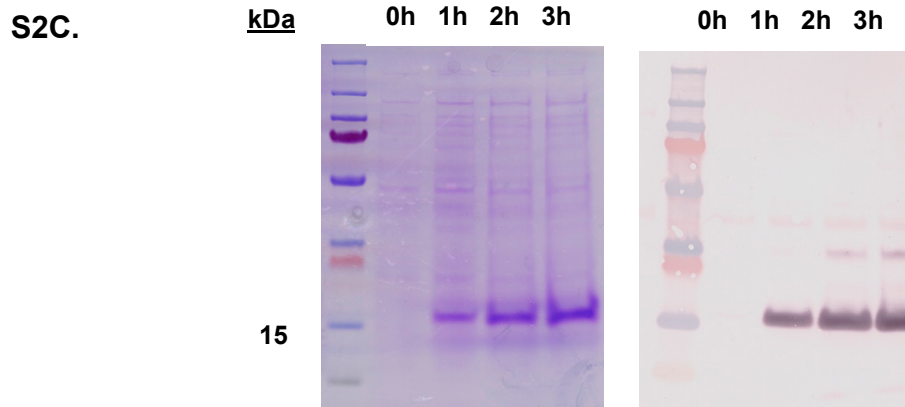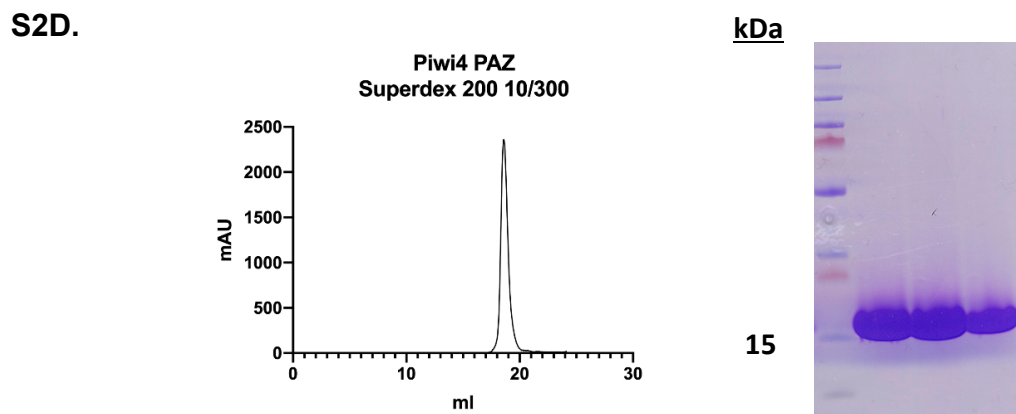

**Supplemental Figure S2. AePiwi4 PAZ expression and purification.** **A.** *AePiwi4* PAZ nucleotide sequence, including restriction enzyme sites (lower case letters) used for cloning and a 6xHis-tag tag (underlined). **B.** *AePiwi4* PAZ amino acid sequence, including 6xHis-tag. **C.** *AePiwi4* PAZ expression trial in *E. coli* BL21(DE3) pLYsS cells assessed by Coomassie-stained (left) and anti-6xHis-tag western blot. Lanes indicate hours post-induction. **D.** *AePiwi4* PAZ protein purification by size exclusion chromatography (left) where peak elutions were confirmed by Coomassie-stained SDS/PAGE gel (right). Expected *AePiwi4* PAZ protein size = 14 kDa.

**S3A.**

**>AePiwi4\_PAZ\_T39A\_DNA**

```
catatgCAGACATGCTACGACATCTTGC GCGATTGTCAGAAGCACGATCGTAACTACA
AGGATTCGTTCAAACGTGCCGTACTTGGTGTCTGTTGTA CTGACCGGTTACAACAAT
AAAGCCTATACCATTCACGACGTCACGTTTGA AACCACTCCGGAGAGTACGTTCTGA
TACCAAGGCCGGTAAACGTCCTTCATTGAGTATTACAAACAGAAGTACAACATTC
GCATTCGTGATCCACATCAGCCTATGTTGCTGTCTGCGAGCCAAGAAACGCGATCT
GCGCGCTGGAGGCAGCGAACTCATGGCCCTTGTTCCAGAACTGTGCCAGATGAC
GCATCATCACCATCACCATTGAActcgag
```

**S3B.**

**>AePiwi4\_PAZ\_T39A\_protein**

MQTCYDILRDCQKHDRNYKDSFKRAVLGVVLTGYNNK**A**YTIHDVTFETTPESTFDTK  
AGKTSFIEYYKQKYNIRIRDPHQPMLLSRAKKRDLRAGGSELMAALVPELCQMTHHHHH  
H

**S3C.**

**>AePiwi4\_PAZ\_Y40A\_DNA**

catatgCAGACATGCTACGACATCTTGCGCGATTGTCAGAAGCACGATCGTAACTACA  
AGGATTCGTTCAAACGTGCCGTACTTGGTGTCTGTTGTTACTGACCGGTTACAACAAT  
AAAACCG**G**CATTACACGACGTCACGTTTCAAACCACTCCGGAGAGTACGTTCTGA  
TACCAAGGCCGGTAAAACGTCCTTCATTGAGTATTACAAACAGAAGTACAACATTC  
GCATTCGTGATCCACATCAGCCTATGTTGCTGTCTGCGAGCCAAGAAACGCGATCT  
GCGCGCTGGAGGCAGCGAACTCATGGCCCTTGTTCCAGAACTGTGCCAGATGAC  
GCATCATCACCATCACCATTGActcgag

**S3D.**

**>AePiwi4\_PAZ\_Y40A\_protein**

MQTCYDILRDCQKHDRNYKDSFKRAVLGVVLTGYNNK**T**ATIHDVTFETTPESTFDTK  
AGKTSFIEYYKQKYNIRIRDPHQPMLLSRAKKRDLRAGGSELMAALVPELCQMTHHHHH  
H

**S3E.**

**>AePiwi4\_PAZ\_T41A\_DNA**

catatgCAGACATGCTACGACATCTTGCGCGATTGTCAGAAGCACGATCGTAACTACA  
AGGATTCGTTCAAACGTGCCGTACTTGGTGTCTGTTGTTACTGACCGGTTACAACAAT  
AAAACCTAT**G**CCATTACACGACGTCACGTTTCAAACCACTCCGGAGAGTACGTTCTGA  
TACCAAGGCCGGTAAAACGTCCTTCATTGAGTATTACAAACAGAAGTACAACATTC  
GCATTCGTGATCCACATCAGCCTATGTTGCTGTCTGCGAGCCAAGAAACGCGATCT  
GCGCGCTGGAGGCAGCGAACTCATGGCCCTTGTTCCAGAACTGTGCCAGATGAC  
GCATCATCACCATCACCATTGActcgag

**S3F.**

**>AePiwi4\_PAZ\_T41A\_protein**

MQTCYDILRDCQKHDRNYKDSFKRAVLGVVLTGYNNK**T**YAIHDVTFETTPESTFDTK  
AGKTSFIEYYKQKYNIRIRDPHQPMLLSRAKKRDLRAGGSELMAALVPELCQMTHHHHH  
H

**S3G.**

**>AePiwi4\_PAZ\_T41R\_DNA**

catatgCAGACATGCTACGACATCTTGCGCGATTGTCAGAAGCACGATCGTAACTACA  
AGGATTCGTTCAAACGTGCCGTACTTGGTGTCTGTTGTTACTGACCGGTTACAACAAT  
AAAACCTAT**C**GCATTACACGACGTCACGTTTCAAACCACTCCGGAGAGTACGTTCTGA  
TACCAAGGCCGGTAAAACGTCCTTCATTGAGTATTACAAACAGAAGTACAACATTC  
GCATTCGTGATCCACATCAGCCTATGTTGCTGTCTGCGAGCCAAGAAACGCGATCT  
GCGCGCTGGAGGCAGCGAACTCATGGCCCTTGTTCCAGAACTGTGCCAGATGAC  
GCATCATCACCATCACCATTGActcgag

**S3H.**

**>AePiwi4\_PAZ\_T41R\_protein**

MQTCYDILRDCQKHDRNYKDSFKRAVLGVVLTGYNNKTY**R**IHDVTFETTPESTFDTK  
AGKTSFIEYYKQKYNIRIRDPHQPMLLSRAKKRDLRAGGSELMALVPELCQMTHHHHH  
H

**S3I.**

**>AePiwi4\_PAZ\_F55A\_DNA**

catatgCAGACATGCTACGACATCTTGC GCGATTGTCAGAAGCACGATCGTAACTACA  
AGGATTCGTTCAAACGTGCCGTACTTGGTGTCTGTTGTACTGACCGGTTACAACAAT  
AAAACCTATACCATTCACGACGTCACGTTTGAAACCACTCCGGAGAGTACG**G**CCGA  
TACCAAGGCCGGTAAAACGTCCTTCATTGAGTATTACAAACAGAAGTACAACATTC  
GCATTCGTGATCCACATCAGCCTATGTTGCTGTCTGCGAGCCAAGAAACGCGATCT  
GCGCGCTGGAGGCAGCGAACTCATGGCCCTTGTTCCAGAACTGTGCCAGATGAC  
GCAT**CATCACCATCACCATTG**Actcgag

**S3J.**

**>AePiwi4\_PAZ\_F55A\_protein**

MQTCYDILRDCQKHDRNYKDSFKRAVLGVVLTGYNNKTYTIHDVTFETTPEST**A**DTK  
AGKTSFIEYYKQKYNIRIRDPHQPMLLSRAKKRDLRAGGSELMALVPELCQMTHHHHH  
H

**Supplemental Figure S3. AePiwi4 PAZ mutant nucleotide and protein sequences.**

Mutant *AePiwi4* PAZ (A) T39A, (C) Y40A, (E) T41A, (G) T41R, (I) F55A nucleotide sequences, including restriction enzyme sites (lower case letters) used for cloning and a 6xhis tag (underlined). Mutant site is bolded and underlined. Mutant *AePiwi4* PAZ (B) T39A, (D) Y40A, (F) T41A, (H) T41R, (J) F55A amino acid sequences, including 6xHis-tag. Mutation site is bolded and underlined.

**S4.**

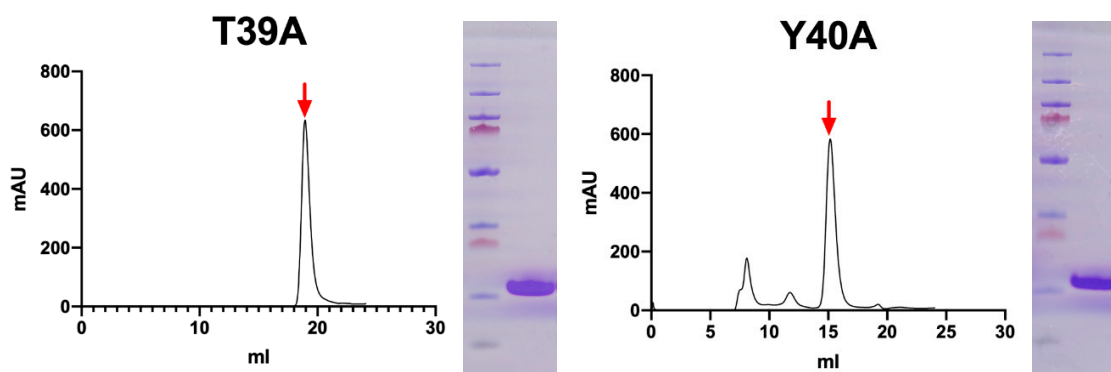

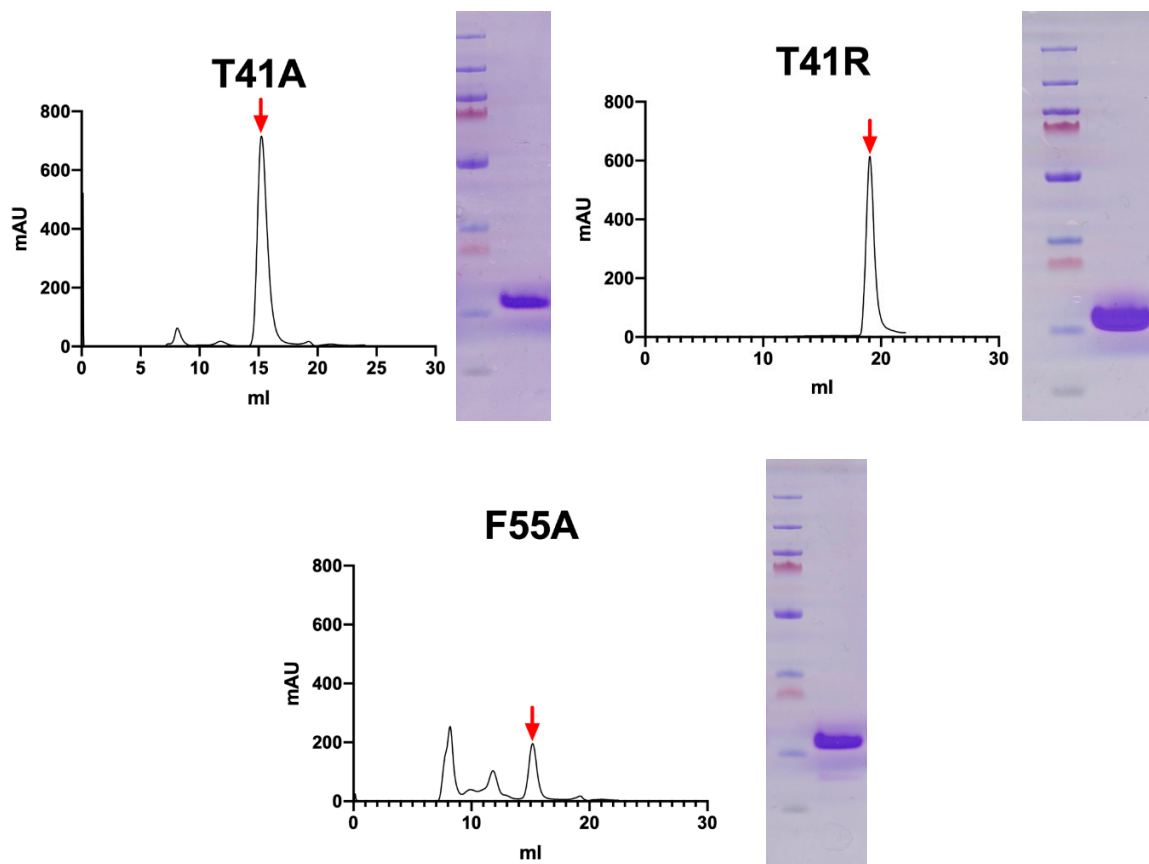

**Supplemental Figure S4. Expression and Purification of AePiwi4 PAZ proteins displaying respective mutations in predicted RNA binding pockets.** Size Exclusion Chromatograms and corresponding Coomassie-stained SDS/PAGE gels of purified T39A, Y40A, T41A, T41R, or F55A AePiwi4 PAZ mutants. Predicted size of all proteins are ~ 14 kDa. Red arrows indicate protein peaks of interest.

**S5.**

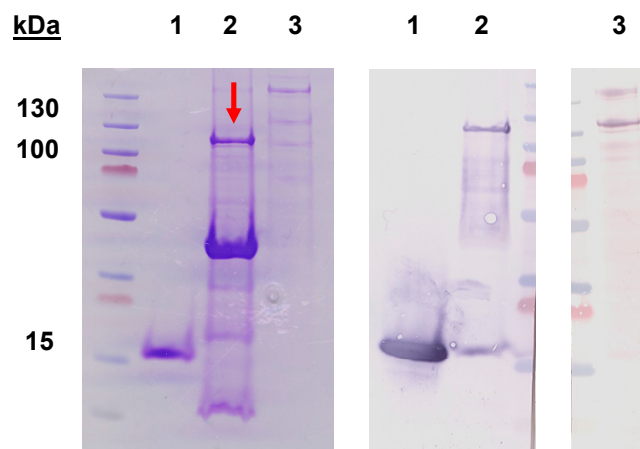

**Supplemental Figure S5. Anti-AePiwi4 PAZ reacts to AePiwi4 by western blot with recombinant proteins and whole mosquito lysate. Left.** Coomassie-stained SDS/PAGE gel with recombinant AePiwi4 PAZ (lane 1), recombinant AePiwi4 full length (lane 2, indicated by red arrow), and whole mosquito lysate (lane 3). **Right.** Corresponding western blot of recombinant AePiwi4 PAZ (lane 1), recombinant AePiwi4 full length (lane 2), and whole mosquito lysate (lane 3) reacts against mouse serum after immunization with recombinant AePiwi4 PAZ.

**S6A.**

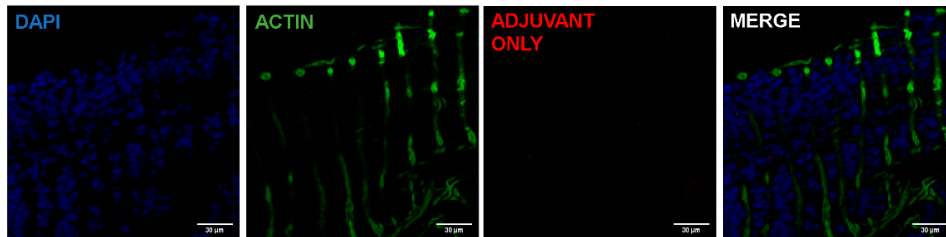

**S6B.**

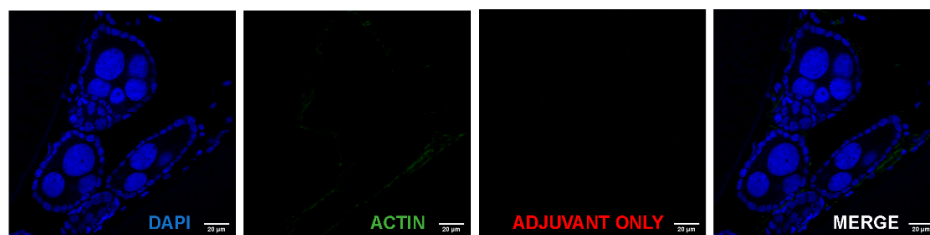

**Supplemental Figure S6. Negative control IFA images of *Ae. aegypti* (A) midguts and (B) ovaries containing unfertilized eggs.** IFA images of (A) *Ae. aegypti* midguts or (B) ovaries stained with mouse serum immunized with Magic Mouse adjuvant alone (red), phalloidin (green), and DAPI (blue) as negative controls for IFA analyses. Scale bars = 30 μm or 20 μm for midgut and ovary images, respectively.

**S7.**

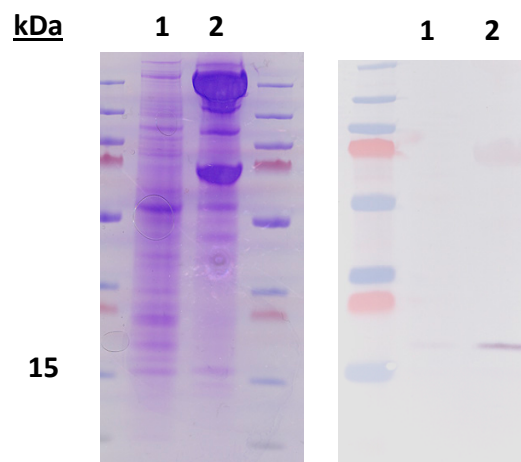



**Supplemental Figure S7. Nuclear marker against *Ae. aegypti* ovary tissue cytoplasmic and nuclear fractions.** **Left.** Coomassie-stained SDS/PAGE gel of ovary cytoplasmic (lane 1) or nuclear (lane 2) fractions display different banding patterns. **Right.** anti-H3 histone reacts against the nuclear fraction (lane 2) and not the cytoplasmic fraction (lane 1). Expected H3 size = 17 kDa.

**S8A.**

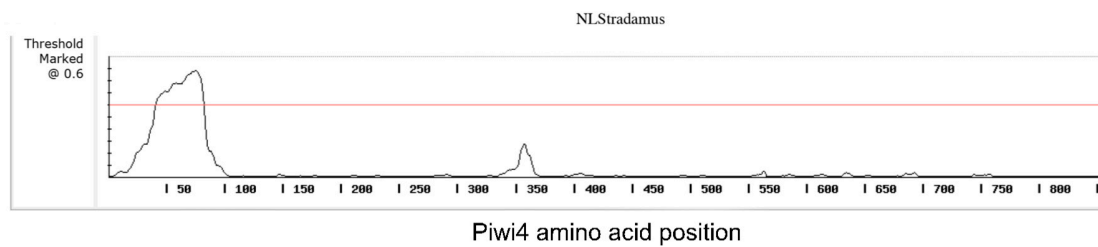

**S8B.**

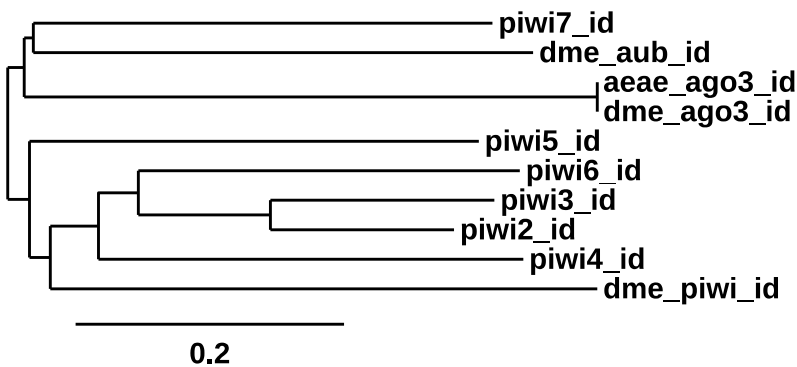

**Supplemental Figure S8. Putative N-terminal NLS present in AePiwi4. A.** Putative AePiwi4 NLS relative to a threshold predicted by NLStradamus (bottom) (Nguyen Ba *et al.*, 2009). **B.** Phylogenetic tree comparing the intrinsically disordered (id) domains of *Drosophila melanogaster* (dme) and *Aedes aegypti* (aeae) Piwi proteins. Scale bar indicates number of substitutions per site.
